1 **Negative frequency-dependent selection maintains coexisting genotypes during fluctuating selection**

2

3 **Running title:** Coexistence during fluctuating selection

4

5 **Authors:**

6 Caroline B. Turner: Department of Microbiology and Molecular Genetics, University of Pittsburgh,

7 Pittsburgh PA, 15219, USA.

8

9 Sean W. Buskirk: Department of Molecular, Cellular, and Biomedical Sciences, University of New

10 Hampshire, Durham, NH 03824, USA. Current address: Department of Biology, West Chester University,

11 West Chester, PA 19383, USA.

12

13 Katrina B. Harris: Department of Microbiology and Molecular Genetics, University of Pittsburgh,

14 Pittsburgh PA, 15219, USA

15

16 Vaughn S. Cooper: Department of Microbiology and Molecular Genetics, and Center for Evolutionary

17 Biology and Medicine University of Pittsburgh, Pittsburgh PA, 15219, USA

18

19 **Abstract:**

20           Natural environments are rarely static; rather selection can fluctuate on time scales ranging from  
21 hours to centuries. However, it is unclear how adaptation to fluctuating environments differs from  
22 adaptation to constant environments at the genetic level. For bacteria, one key axis of environmental  
23 variation is selection for planktonic or biofilm modes of growth. We conducted an evolution experiment  
24 with *Burkholderia cenocepacia*, comparing the evolutionary dynamics of populations evolving under  
25 constant selection for either biofilm formation or planktonic growth with populations in which selection  
26 fluctuated between the two environments on a weekly basis. Populations evolved in the fluctuating  
27 environment shared many of the same genetic targets of selection as those evolved in constant biofilm  
28 selection, but were genetically distinct from the constant planktonic populations. In the fluctuating  
29 environment, mutations in the biofilm-regulating genes *wspA* and *rpfR* rose to high frequency in all  
30 replicate populations. A mutation in *wspA* first rose rapidly and nearly fixed during the initial biofilm  
31 phase but was subsequently displaced by a collection of *rpfR* mutants upon the shift to the planktonic  
32 phase. The *wspA* and *rpfR* genotypes coexisted via negative frequency-dependent selection around an  
33 equilibrium frequency that shifted between the environments. The maintenance of coexisting genotypes in  
34 the fluctuating environment was unexpected. Under temporally fluctuating environments coexistence of  
35 two genotypes is only predicted under a narrow range of conditions, but the frequency-dependent  
36 interactions we observed provide a mechanism that can increase the likelihood of coexistence in  
37 fluctuating environments.

38

39

40 **Introduction:**

41

42 Environmental variability is ubiquitous in the natural world: from daily fluctuations, to seasonal  
43 changes, to climatic variability. In contrast, evolution experiments are most commonly conducted in  
44 relatively constant environments (Lenski et al. 1991; Burke et al. 2010; Lang et al. 2013). Organisms can  
45 adapt to environmental variability in a number of ways, depending on the frequency and predictability of  
46 changes, the joint fitness landscape across environments, and genetic constraints (Beaumont et al. 2009;  
47 Kassen 2014; Botero et al. 2015). One possible outcome is selection for a single generalist genotype. In  
48 this case, selection favors genotypes with higher net fitness across the range of environmental variation.  
49 The evolution of generalists is often observed in experiments with temporally fluctuating environments  
50 (Reboud and Bell 1997; Weaver et al. 1999; Remold et al. 2008; Vasilakis et al. 2009). Generalists may be  
51 successful across environments either by acquiring mutations that are beneficial across environments, by  
52 acquiring mutations that are beneficial in one environment and have minimal cost in other environments,  
53 or by the evolution of phenotypic plasticity (Kassen 2014; Karve et al. 2016). Theory predicts that  
54 phenotypic plasticity is favored in environments where fluctuations are predictable and occur over a  
55 relatively short time span. Longer time between changes in environment instead favor repeated adaptation  
56 to the current environment (Botero et al. 2015).

57 Instead of a single generalist genotype, variable environments could alternatively favor the  
58 maintenance of polymorphism. In this case, multiple genotypes would be maintained in the population  
59 with each genotype having a fitness advantage in some subset of environments. Selection for multiple  
60 specialists under fluctuating environmental conditions is a possible mechanism for the maintenance of  
61 biodiversity. However, theory and experiments suggest that the conditions under which selection favors  
62 the coexistence of multiple specialists are relatively narrow. Fluctuations must be rapid enough such that  
63 neither specialist is driven extinct before the environment in which they are favored returns (Rodríguez-  
64 Verdugo et al. 2019). Furthermore, the productivity over time of the different specialists must be roughly

65 equal so that populations of both specialists are maintained over time (Maynard Smith and Hoekstra 1980;  
66 Van Tienderen 1997).

67         The study of factors that promote the origin and maintenance of genetic variation despite strong  
68 selection represents an active area of research (Gloss et al. 2016; Huang et al. 2016; Edwards et al. 2018).  
69 One important question is how the period of environmental variation influences genetic polymorphism.  
70 For example, many evolution experiments are conducted by batch transfer wherein a small proportion of  
71 organisms are transferred to fresh growth media at regular intervals. Although conditions remain constant  
72 *between* growth cycles, many aspects of the environment including nutrient availability and population  
73 density can differ dramatically *during* a growth cycle. These within-day fluctuations can lead to the  
74 evolution of multiple coexisting genotypes, often via evolution of a genotype that specializes to consume  
75 metabolic by-products (Rozen and Lenski 2000; Kinnersley et al. 2014; Turner et al. 2015). Coexisting  
76 resistant and vulnerable genotypes also can emerge in predator-prey experiments where predator  
77 frequency cycles over time (Bohannan et al. 2002; Becks et al. 2010). A number of experiments have  
78 demonstrated coexistence between different pre-existing species in fluctuating environments (Legan et al.  
79 1987; Brzezinski and Nelson 1988; Rodríguez-Verdugo et al. 2019). Outside of the evolution of cross-  
80 feeding, we are not aware of the *de novo* evolution of multiple co-existing genotypes from an experiment  
81 in which a single ancestral genotype was propagated under temporally fluctuating conditions. Indeed, even  
82 in an experiment where spatial variation in light availability selected for the evolution of coexisting  
83 genotypes, coexistence did not emerge when the environments varied temporally rather than spatially  
84 (Reboud and Bell 1997). That experiment confirmed theoretical expectations that temporal variation is  
85 less likely to promote coexistence than spatial variation (Kassen 2002).

86         Bacteria are useful organisms for studying the evolutionary response to fluctuating environments  
87 due to their small size, rapid reproduction, and the ability to revive frozen samples (Lenski et al. 1991). In  
88 this study, we focus on a key type of temporal variation in lifestyle for bacteria: surface-attached biofilm  
89 growth versus free-living planktonic growth. Approximately 80% of bacteria on Earth's surface are found

90 in biofilms (Flemming and Wuertz 2019), but planktonic growth is an important means of dispersal and  
91 allows for faster growth rates under favorable conditions. For example, during infection of the human gut,  
92 *Vibrio cholerae* transitions from a gut-attached biofilm to planktonic growth when dispersing via induced  
93 diarrhea and then back to biofilm growth upon attachment to zooplankton in water bodies (Hall-Stoodley  
94 and Stoodley 2005). Bacteria have evolved a variety of regulatory mechanisms to facilitate the switch  
95 between biofilm and planktonic modes of growth. However, growth in a constant environment may favor  
96 mutations that inactivate these regulatory mechanisms, resulting in organisms which are specialized for a  
97 particular mode of growth (Mann and Wozniak 2012; O'Rourke et al. 2015).

98 In this study, we report the genetic patterns of adaptation by the bacterium *Burkholderia*  
99 *cenocepacia* to environments that impose fluctuating selection for biofilm and planktonic modes of  
100 growth. *B. cenocepacia* is a Gram-negative bacterium typically found in agricultural soil and also an  
101 opportunistic pathogen that causes chronic pulmonary infections in individuals with the inherited disorder  
102 cystic fibrosis (Drevinek and Mahenthiralingam 2010). Replicate populations were propagated under one  
103 of three different regimes: constant biofilm, constant planktonic, or fluctuating biofilm/planktonic at  
104 weekly (~47-53 generation) intervals. We determined the identity and frequency over time of mutations in  
105 the populations via periodic whole-population, whole-genome sequencing. These data enabled us to  
106 address two main questions: 1. Does adaptation to fluctuating conditions occur via the evolution of one  
107 ecological generalist that persisted throughout the experiments, or via multiple ecological specialists that  
108 are favored during each phase of selection? 2. Does adaptation to fluctuating selection proceed by  
109 mutations in a different set of genes than those selected in constant environments?

110

## 111 **Methods:**

112

113 *Evolution experiment*

114 We founded eight populations from a clone of *B. cenocepacia* strain HI2424, originally isolated  
115 from an onion field as an environmental isolate of the PHDC strain type that has been recovered from  
116 cystic fibrosis patients worldwide (LiPuma et al. 2002). The populations evolved for 28 days with daily  
117 transfer in M9 minimal media with galactose (GMM, 0.37 mM CaCl<sub>2</sub>, 8.7 mM MgSO<sub>4</sub>, 42.2 mM  
118 Na<sub>2</sub>HPO<sub>4</sub>, 22 mM KH<sub>2</sub>PO<sub>4</sub>, 21.7 mM NaCl, 18.7 mM NH<sub>4</sub>Cl, and 145 mM galactose). Populations were  
119 founded from an isolated colony grown overnight in 5 mL tryptic soy broth. Four populations were  
120 propagated under constant biofilm selection (Poltak and Cooper 2011, Figure 1A). Concurrently, four  
121 other populations evolved under a fluctuating environment regime consisting of seven days of biofilm  
122 propagation alternating with seven days of planktonic propagation (Figure 1B and 1C). During planktonic  
123 selection, 50 µL of culture was transferred to 5 mL of fresh media (6.67 generations/day). During biofilm  
124 selection, a colonized polystyrene bead was transferred to 5 mL fresh media with two sterile beads (~7.5  
125 generations/day, Traverse et al. 2013). Before transferring, the bead was rinsed in 1 mL of phosphate  
126 buffered saline (PBS), a modification to our previously published protocol that removes residual  
127 planktonic bacteria and was predicted to strengthen selection for attachment. Following transfer to a new  
128 tube, this regime selects for bacteria that disperse from the transferred bead and attach to the new beads.  
129 Populations were incubated for 24 hours at 37 °C in a roller drum rotating at 30 rpm.

130 In the fluctuating environment, we collected population samples at days 1, 4, and 7 of each phase.  
131 In the constant biofilm environment, we collected population samples on days 1, 4, 7, 14, 21 and 28.  
132 Genomic sequencing revealed that the day 28 samples for two of these populations were contaminated so  
133 these samples were excluded from analysis. To collect biofilm population samples, one bead was rinsed in  
134 PBS, then transferred to a cryovial containing 1 mL GMM and 100 µL DMSO. To remove the bacteria  
135 from the bead, vials were vortexed before freezing at -80 °C. For planktonic samples, we transferred 50  
136 µL of liquid culture to a cryovial containing 1 mL GMM and 100 µL DMSO and vortexed to mix.

137 Based on the results from the initial experiment, we additionally propagated four populations,  
138 founded by the same ancestor, under constant planktonic conditions for 11 days. We chose to evolve these

139 populations for 11 days and compare their selected mutations with those that arose to high frequency by  
140 day 11 in the fluctuating environment. Planktonic selection was maintained in the same manner as  
141 described above for the planktonic phase of the fluctuating environment (Figure 1B). Evolution of the  
142 constant planktonic populations was performed in a different laboratory. To account for differences in  
143 trace metals in the water supply of the two labs, the following elements were added to the GMM media for  
144 these experiments: 40 µg/L Ca, 0.3 µg/L Mn, 11 µg/L K, 25 µg/L Na, 50 µg/L Zn, 0.044 µg/L Co, 0.58  
145 µg/L Cu.

146

#### 147 *Genome sequencing*

148 Populations from all time points sampled were sequenced. For sequencing, populations were  
149 revived from 50 µL of frozen culture and grown under the same conditions as the evolution experiment.  
150 For biofilm samples, bacteria were removed from beads by vortexing in PBS prior to DNA extraction  
151 using the Qiagen DNeasy Blood and Tissue kit (Qiagen, Hilden, Germany). For planktonic samples,  
152 DNA was extracted using the same kit with bacteria from liquid culture. All samples were sequenced to at  
153 least 80-fold average coverage on either an Illumina HiSeq 2500 (University of New Hampshire Hubbard  
154 Center for Genome Studies) or an Illumina NextSeq 500 (University of Pittsburgh Microbial Genome  
155 Sequencing Center, University of Pittsburgh). Samples were trimmed using Trimmomatic (version 0.36,  
156 Bolger et al. 2014) and evolved mutations were identified by comparison with the ancestral *B.*  
157 *cenocepacia* HI2424 (GCF 000203955.1) using Breseq (version 0.28, Deatherage and Barrick 2014) with  
158 the default settings in the polymorphism mode. The threshold for detection of mutations was 0.05. We  
159 manually curated the mutations to remove false positives due to misaligned reads. We report only genes in  
160 which at least one mutation rose to 0.10 frequency or higher in at least one population sample.

161

#### 162 *Fitness Assays*

163 Fitness effects of evolved *wspA* F463L and *rpfR* D104G mutations were determined from clones  
164 containing representative alleles isolated from fluctuating environment populations. We focused on these  
165 two mutations because they were present at high frequency in many of our evolved populations. Whole  
166 genome sequencing confirmed the otherwise isogenic nature of the clones.

167 Fitness of *wspA* and *rpfR* mutants compared to the ancestor and one another was measured in both  
168 planktonic and biofilm conditions. Strains were revived from freezer stocks in 5 ml tryptic soy broth.  
169 After overnight growth, 50  $\mu$ l of culture was transferred to 5 ml GMM to acclimate the strains to the  
170 competition media. After acclimation, planktonic competitions were started by inoculating 5 ml GMM  
171 with 25  $\mu$ l of each competitor. Biofilm competitions were started in an identical manner, with the  
172 exception that 2 polystyrene beads were added at the time of inoculation. After 24 h, we transferred 50  $\mu$ l  
173 culture to new GMM for planktonic competitions, or one bead to new GMM containing two sterile  
174 marked beads for biofilm competitions. This experimental setup closely replicated evolution conditions.  
175 Samples were collected from the competitions at day 0, 1, and 2, diluted in PBS, and plated on tryptic soy  
176 agar. For biofilm competitions, bacteria were harvested from a single bead for enumeration. To compare  
177 fitness between the *wspA* and *rpfR* mutants and the ancestor, we used a fitness-neutral, *lac*<sup>+</sup> marked  
178 version of the ancestor (Poltak and Cooper 2011) and plated on tryptic soy agar supplemented with X-gal  
179 to differentiate between the *lac*<sup>+</sup> and *lac*<sup>-</sup> competitors. In competitions between the *wspA* and *rpfR* mutants,  
180 genotypes were differentiated based on their distinctive colony morphologies (small and wrinkly vs. large  
181 and smooth).

182 Fitness was calculated as selection rate per day:

$$183 \quad r = \frac{\ln A_{d=0}/A_{d=2} - \ln B_{d=0}/B_{d=2}}{2}$$

184 where *A* and *B* represent the densities of the two competitors and *d* indicates the timepoint. A selection  
185 rate of zero indicates that the two competitors have equal fitness. A positive selection rate indicates that  
186 competitor A is more fit, while a negative selection rate indicates that competitor B is more fit.



187 To measure frequency-dependent interactions between the *wspA* and *rpfR* mutants, we initiated  
188 competitions at a range of starting frequencies (approximately 0.1, 0.3, 0.5, 0.7, 0.9) by altering the  
189 volume of each competitor while maintaining total population size. We conducted these frequency-  
190 dependence competitions between the *wspA* and *rpfR* mutants in both biofilm and planktonic conditions.

191 In the constant planktonic environments, mutations in *rpoC* evolved in three of four populations.  
192 From one of these populations, we isolated a clone that contained only a *rpoC* mutation (T672R) and  
193 competed this isogenic mutant against a *lac*<sup>+</sup>-marked ancestor. In parallel, we assayed the fitness of two  
194 isogenic *rpfR* mutants (D104G and Y355D) against the *lac*<sup>+</sup>-marked ancestor. The *rpfR* Y355D mutation  
195 has evolved independently in multiple experiments (Traverse et al. 2013; Turner et al. 2018) and was  
196 included here as a “high fitness” *rpfR* allele. Each competition was founded with equal starting ratios of  
197 each strain and propagated planktonically.

198

### 199 *Growth curves and pH effects*

200 We measured growth rate and pH tolerance to better understand the phenotypic differences  
201 between the ancestral, *rpfR* D104G and *wspA* F463L genotypes that might underlie frequency dependence  
202 between the *rpfR* and *wspA* mutants. We measured growth rate in 3% GMM in a 96-well plate on a  
203 SpectraMax plate reader (Molecular Devices, San Jose, CA). Five replicates of each strain were grown at  
204 37° C for 24 hours, with shaking and measurement of OD<sub>600</sub> every 10 minutes. Because growth in 3%  
205 GMM lowers the pH of the media to 4.1 after 24 hours, we also measured the survival of these strains in  
206 PBS at pH 4.1 and 7.0. We plated five replicate populations of each genotype at each pH on tryptic soy  
207 agar to measure the population size at 24 hours.

208

### 209 **Results:**

210 An evolution experiment with an environmental isolate of *B. cenocepacia* was conducted for 28  
211 days and analyzed by population-wide, whole-genomic sequencing. Four populations were propagated

212 under constant selection in a bead model of the biofilm life cycle (Poltak and Cooper 2011, Figure 1A),  
213 and four other populations were propagated under fluctuating selection, with one week in the biofilm  
214 model followed by one week of planktonic propagation (Figure 1B and 1C). We identified 295 mutations  
215 in these eight populations, of which 219 were nonsynonymous and 20 were synonymous base-pair  
216 substitutions. Despite the differences in selective conditions, we observed a high degree of parallel  
217 evolution at the gene level both within and between populations in both regimes (Table 1). Of 70 total  
218 genes with observed mutations, 16 had mutations at a detectable frequency in two or more biofilm-  
219 selected and fluctuating-environment populations (Tables 1 and S1). Most notably, mutations in *rpfR* (also  
220 denoted *yciR* or *pdeR* in other species), encoding a bi-functional diguanylate cyclase and  
221 phosphodiesterase as well as a sensor domain, *wspA*, encoding a transmembrane surface receptor, and  
222 *sucA*, encoding 2-oxoglutarate dehydrogenase (OGDH) were identified in all four fluctuating environment  
223 populations as well as three or more constant biofilm populations. Mutations in these genes have also been  
224 observed repeatedly in previous biofilm selection experiments with *B. cenocepacia* (Traverse et al. 2013;  
225 Turner et al. 2018). The nonsynonymous mutations in *wspA* and *rpfR* increase biofilm production by  
226 genetic de-repression, whereas mutations in *sucA* are metabolic adaptations (O'Rourke et al. 2015).  
227 Contrary to our expectations, there was no indication that the genes in which mutations were selected  
228 differed systematically between the biofilm and fluctuating environments.

229 Mutations in the biofilm-regulating genes *wspA* and *rpfR* rose to frequencies  $> 0.60$  in all  
230 fluctuating-environment populations in at least one sample. The same mutation in *wspA* (F463L) rose to  
231 high frequency in all four constant biofilm populations and all four fluctuating environment populations  
232 (Figure 2). Given the appearance of the same exact allele and its early rise in all eight populations, we  
233 infer that the *wspA* F463L mutation was present at low frequency in the founding culture despite being  
234 undetectable by whole-population genomic sequencing. The presence of a pre-existing mutation would  
235 also help explain the rapid rise of *wspA* mutations to nearly 100% frequency in the populations. Several  
236 *rpfR* mutations were detected in multiple populations, raising the possibility of their presence at low

237 frequency in the shared ancestral culture, though repeated independent mutations of the same *rpfR*  
238 nucleotide have been observed in prior experiments (Turner et al. 2018). Other *rpfR* alleles, however, were  
239 unique to individual populations and thus *de novo* mutations. The *rpfR* alleles ranged in identity from  
240 missense point mutations to small and large indels (Table S1).

241 Remarkable parallelism also occurred in the evolutionary dynamics of the *wspA* and *rpfR*  
242 genotypes during fluctuating selection (Figure 2). The *wspA* and *rpfR* genotypes oscillated in frequency  
243 according to the environment, with *wspA* increasing during biofilm selection and *rpfR* increasing during  
244 planktonic selection. In all populations, *wspA* F463L initially spread to high frequency during the biofilm  
245 phase, but the shift to the planktonic phase selected for multiple *rpfR* genotypes that displaced the *wspA*  
246 genotype and competed with one another by clonal interference. Following the first biofilm to planktonic  
247 transition at day 7, a drastic shift in *wspA* and *rpfR* frequencies occurred in all four populations. In  
248 contrast, the frequency shifts following the second biofilm-planktonic transition were more gradual in two  
249 populations (Figure 2), possibly due to secondary mutations that were acquired on the *wspA* and *rpfR*  
250 backgrounds.

251 In previous evolution experiments under very similar conditions (Traverse et al. 2013; Turner et  
252 al. 2018), *rpfR* mutations were frequently selected in biofilm populations but rare in populations under  
253 planktonic selection, in contrast to the patterns seen here. We hypothesized that *rpfR* mutants had been  
254 selected during the initial biofilm phase of selection yet were outcompeted by *wspA*, and only upon  
255 transfer to the planktonic environment were *rpfR* mutants enriched because of the selective disadvantage  
256 of *wspA*. To better elucidate the selective advantages of *rpfR* mutants under planktonic selection, four  
257 replicate populations were founded from the same ancestral clone and evolved under planktonic selection  
258 for 11 days. Population sequencing failed to detect any mutations in *rpfR* above a minimum detection  
259 threshold of 5% frequency. Instead, mutations in *rpoC* (encoding RNA polymerase  $\beta'$ ) were detected in  
260 three of the four populations at frequencies ranging from 0.06 to 0.49. (Table 1). A clone containing only  
261 a *rpoC* mutation (T762R) was isolated from a constant planktonic population. In competitions against the

262 ancestor, the *rpoC* mutation conferred a larger fitness benefit than both the evolved *rpfR* D104G and a  
263 high fitness *rpfR* mutation that repeatedly evolved in previous experiments (Y355D, Fig. 3). This result  
264 suggests that though *rpfR* is beneficial in planktonic conditions, its fitness effect is less than that of other  
265 available mutations – such as *rpoC* – and thus it fails to rise to a detectable frequency during constant  
266 planktonic selection.

267         Next, we explored the ecological basis of the observed coexistence between the *wspA* and *rpfR*  
268 genotypes. Clones containing only the *wspA* (F463L) or the *rpfR* (D104G) mutation were isolated from  
269 evolved fluctuating populations. From the observed evolutionary dynamics of the fluctuating environment  
270 populations (Fig. 2A), we expected the *rpfR* mutant to have higher fitness in the planktonic environment  
271 and the *wspA* mutant to have higher fitness in biofilms. Indeed, the ancestor was outcompeted by the *rpfR*  
272 mutant in planktonic conditions and by the *wspA* mutant in biofilm conditions (Fig. 4A). The *wspA* mutant  
273 exhibited a fitness tradeoff in planktonic conditions, consistent with the observed evolutionary dynamics.  
274 Surprisingly, however, the *rpfR* mutant exhibited a significant fitness advantage over the ancestor in  
275 biofilm conditions, to a similar extent as the *wspA* mutant. Further, when competed head-to-head in  
276 biofilm conditions, the fitness of the *rpfR* mutant was indistinguishable from the *wspA* mutant. These data  
277 suggest that the *rpfR* mutation provides a fitness advantage in both environments, prompting the question  
278 of why *wspA* genotypes dominated the *rpfR* genotypes during the biofilm phase of the fluctuating  
279 environment regime.

280         A potential explanation for mutant coexistence could involve frequency-dependent selection.  
281 Whereas the original fitness assays of evolved mutants were performed by mixing strains in equal ratios,  
282 we investigated whether starting ratios influenced fitness by combining mutants across a range of  
283 frequencies. Negative frequency dependence – or advantage-when-rare -- is evident in competitions  
284 between the *wspA* and *rpfR* mutants in both planktonic and biofilm conditions (Fig. 4B). However, the  
285 equilibrium frequency – the frequency at which both strains are equally fit – shifted between

286 environments, with *rpfR* having a higher equilibrium frequency under planktonic conditions and a lower  
287 equilibrium frequency under biofilm conditions.

288 A possible explanation for negative frequency dependence is ecological differentiation between  
289 the strains. Under planktonic conditions, the *rpfR* D104G mutant grew more quickly and to a higher final  
290 density than the ancestral genotype (Fig. S1A). In contrast, the *wspA* F463L mutant grew more slowly and  
291 to a lower final density than either the ancestor or the *rpfR* mutant. However, the *wspA* mutant exhibited  
292 increased survival at pH 4.1, which is the pH of GMM following 24 hours of growth and acidification of  
293 the environment through metabolic by-products (Fig. S1B), whereas there was no difference in survival at  
294 pH 7.0. This result suggests that broader niche breadth of the competitor with inferior growth rate may  
295 maintain genotype coexistence.

296

#### 297 **Discussion:**

298 Here we report the genetic basis of adaptation and evolutionary dynamics of replicate populations  
299 of *B. cenocepacia* under fluctuating selection for biofilm and planktonic growth. Rather than favoring a  
300 single genotype with the ability to succeed across both biofilm and planktonic conditions, the fluctuating  
301 environment selected for two co-existing lineages, each of which had an advantage during a particular  
302 phase of the experiment. In fluctuating populations, we observed repeated shifts in frequency between two  
303 lineages (Fig. 2), each with a mutation in a different biofilm-regulatory gene (*wspA* and *rpfR*). When  
304 competed against each other, *wspA* and *rpfR* isogenic mutants exhibited stable negative frequency-  
305 dependence, such that both mutants were able to coexist in each environment (Fig. 4B). However, the  
306 frequency of the stable equilibrium shifted depending on the environment. Under biofilm conditions *wspA*  
307 genotypes dominated, forcing *rpfR* mutants below detection, whereas under planktonic selection  
308 conditions the *rpfR* genotypes reached a higher frequency owing to the fitness cost of *wspA* in this  
309 condition.

310 Frequency-dependent coexistence between the two mutants in planktonic conditions may be  
311 driven in part by the acidification of the media during growth to a pH of 4.1. Despite an initial growth rate  
312 advantage of the *rpfR* mutant, the *wspA* mutants exhibit greater survival in acidic conditions caused by  
313 metabolic byproducts of growth in the galactose minimal medium (Fig. S1). The greater biofilm  
314 production of *wsp* pathway mutants relative to *rpfR* mutants (Poltak and Cooper 2011; Traverse et al.  
315 2013) may enable greater tolerance to the stress of low pH. Under biofilm conditions, *wspA* and *rpfR*  
316 mutants have been shown to form distinct biofilm structures, with the *wspA* genotype attaching early,  
317 tightly, and directly to the plastic bead during the biofilm phase while *rpfR* mutants tend to attach later and  
318 adhere to both the plastic bead and to other adherent cells (Poltak and Cooper 2011; Ellis et al. 2015).  
319 These distinctions provide physiological explanations for their frequency-dependent interactions in the  
320 biofilm environment, which requires both biofilm growth and planktonic dispersal during each cycle.

321 Stable negative-frequency dependent coexistence with shifting proportions of *wspA* and *rpfR* can  
322 broadly explain the dynamics observed in the evolution experiment, where *wspA* increased in frequency  
323 during biofilm selection, while *rpfR* increased in frequency during planktonic selection. However, the  
324 frequencies observed in the evolution experiment differed from those predicted by the competitions  
325 between individual strains. Specifically, *rpfR* mutations were undetectable during biofilm selection  
326 whereas the competition experiments suggested that *rpfR* should have an equilibrium frequency of more  
327 than 20% in biofilm conditions. These differences could arise due to the “head start” of *wspA* mutations in  
328 this experiment and later be influenced by additional adaptive mutations arising in *wspA* and *rpfR*  
329 genotypes that improved lineage fitness. The evolutionary head start of the *wspA* mutations is partly due to  
330 biofilm selection occurring first in our fluctuating environments. In addition, it appears likely that the  
331 *wspA* mutation observed in our populations was present at a low frequency in the founder of our  
332 experimental populations. This too could have contributed to an evolutionary head start for the *wspA*  
333 lineage.

334 Our results suggest that coexistence between *rpfR* and *wspA* mutants is ecologically stable, with  
335 the two genotypes coexisting under both biofilm and planktonic conditions. However, it is unclear if  
336 coexistence would be stable over longer evolutionary time frames. In most populations, *wspA* genotypes  
337 reached a higher frequency during the second week of planktonic selection than the first, leading us to  
338 speculate whether a single genotype would eventually fix given enough time. The increased frequency of  
339 *wspA* lineages may be explained by secondary mutations that compensated fitness under planktonic  
340 conditions. Furthermore, epistatic effects of the initial beneficial mutations could increase or decrease  
341 access to subsequent beneficial mutations, producing a scenario in which *wspA* mutants adapt more  
342 rapidly to planktonic conditions than *rpfR* mutants adapt to biofilm conditions. Ultimately, however, the  
343 success of the *wspA* genotypes may simply result from its presence in the standing variation of the  
344 ancestral culture and its dominance in the early phase of the fluctuating regime, and hence its earlier  
345 access to secondary, beneficial mutations.

346 Surprisingly, although the frequencies of mutations within populations differed, there was no clear  
347 difference between fluctuating and constant biofilm environments in the identity of the genes in which  
348 mutations were selected. This could be simply explained by the requirement that bacteria disperse and  
349 attach to the new plastic bead in our biofilm model, essentially producing daily periodicity between  
350 biofilm and planktonic growth. Somewhat related, an inconsistency in the strength of selection imposed  
351 during each phase of the fluctuating environment may partially explain why the mutational spectra of the  
352 constant biofilm and fluctuating environment populations appear indistinguishable. Assuming stringent  
353 biofilm selection, a lineage must acquire a mutation that improves fitness in the biofilm phase in order to  
354 reach the subsequent planktonic phase, at which point available mutations that also afford an advantage in  
355 planktonic condition would begin to dominate. This appears to be the case for the *rpfR* mutations that  
356 enable their lineages to survive the stringent biofilm selection and then thrive upon the shift to the milder  
357 planktonic selection.

358 In contrast, no mutations were observed in common between the fluctuating populations and the  
359 11-day constant planktonic populations. No mutations in *rpfR* were observed in any of the planktonic  
360 populations, even though *rpfR* mutations rose to high frequencies by day 11 in all four fluctuating  
361 environment populations. Although *rpfR* mutants are more fit than the ancestor in planktonic conditions  
362 (Fig. 4), they are less fit than the *rpoC* mutations that were observed in the planktonic-selected  
363 populations (Fig. 3). There are multiple examples of mutations in subunits of RNA polymerase selected  
364 during bacterial evolution experiments selecting for rapid growth in minimal media, which provides  
365 evidence of their specific advantages in planktonic, serially-diluted culture conditions (Barrick et al. 2010;  
366 Conrad et al. 2010; Rodríguez-Verdugo et al. 2014). *rpfR* mutations were also rarely observed under  
367 planktonic selection in previous similar evolution experiments (Traverse et al. 2013; Turner et al. 2018).  
368 These results further support the conclusion that the prevalence of *rpfR* mutations in the planktonic phase  
369 of the fluctuating environment was driven by their combined fitness across both biofilm and planktonic  
370 environments, rather than solely by their advantage in planktonic environments.

371 Adaptation to variable environments can occur through evolution of generalists, phenotypic  
372 plasticity, or coexistence of specialist genotypes. Here, the evolution of *B. cenocepacia* under fluctuating  
373 planktonic or biofilm forms of growth selected for two coexisting genotypes, each having an advantage in  
374 a different phase of the experiment. In contrast, previous evolution experiments involving temporally  
375 fluctuating selection selected a single lineage of generalist mutants (Reboud and Bell 1997). Furthermore,  
376 theory indicates that coexistence of genotypes in temporally fluctuating environments is less likely  
377 because it requires equal productivity of genotypes over time (Maynard Smith and Hoekstra 1980; Van  
378 Tienderen 1997). In the current experiment, coexistence was facilitated by negative frequency-dependent  
379 interactions in which both genotypes were able to stably coexist (at least over ecological timescales) in  
380 both environments. The environmental shifts simply altered the expected frequencies of each genotype.  
381 Our results raise the possibility that frequency-dependent interactions could promote the likelihood and  
382 stability of coexisting genotypes as an outcome of adaptation to non-constant environments. Recent work



383 in microbial experimental evolution has suggested that stable frequency-dependent coexistence may be a  
384 more common than previously expected (Good et al. 2017), and population-genetic surveys of bacteria  
385 colonizing humans also indicate that frequency-dependent dynamics may be common (Silva et al. 2016;  
386 Zhao et al. 2019). This growing evidence suggests that it would be valuable to develop theory considering  
387 the effects of frequency-dependent coexistence on adaptation to variable environments, as well as greater  
388 investment in studies of standing genetic diversity in populations that could be maintained by  
389 environmental periodicity (Corander et al. 2017).

390

391 **Acknowledgements:** We thank D. Snyder, N. Phillips, N. Rouillard and K. Koerner for assistance in the  
392 laboratory. This work was funded by NIH (R01GM110444) and NASA Astrobiology Institute (NAI  
393 CAN-7 NNA15BB04A) grants to VSC.

394

395 **Data accessibility statement:** All data and R scripts will be made available on Dryad. Raw sequencing  
396 reads will be submitted to NCBI SRA.

397 .

398 Author contributions: SWB and VSC designed the research. SWB conducted the original experiment and  
399 CBT conducted subsequent laboratory research. CBT and VSC wrote the manuscript with input from all  
400 authors.

401 **Table:**

| Locus tag:       | Description:                                             | Fluctuating environment populations |  |  | Constant biofilm populations |  |  | Constant planktonic populations |  |  |
|------------------|----------------------------------------------------------|-------------------------------------|--|--|------------------------------|--|--|---------------------------------|--|--|
| BCEN2424_RS17655 | <i>rpfR</i>                                              |                                     |  |  |                              |  |  |                                 |  |  |
| BCEN2424_RS18785 | <i>wspA</i>                                              |                                     |  |  |                              |  |  |                                 |  |  |
| BCEN2424_RS07465 | 2-oxoglutarate dehydrogenase E1 component                |                                     |  |  |                              |  |  |                                 |  |  |
| BCEN2424_RS12130 | Phosphoenolpyruvate carboxylase                          |                                     |  |  |                              |  |  |                                 |  |  |
| BCEN2424_RS12745 | Adenylate kinase                                         |                                     |  |  |                              |  |  |                                 |  |  |
| BCEN2424_RS13815 | Exporter-like protein                                    |                                     |  |  |                              |  |  |                                 |  |  |
| BCEN2424_RS01695 | <i>rpoC</i>                                              |                                     |  |  |                              |  |  |                                 |  |  |
| BCEN2424_RS07470 | Dihydroipoamide succinyltransferase                      |                                     |  |  |                              |  |  |                                 |  |  |
| BCEN2424_RS08045 | Fimbrial protein                                         |                                     |  |  |                              |  |  |                                 |  |  |
| BCEN2424_RS08125 | Lysine/ornithine N-monooxygenase                         |                                     |  |  |                              |  |  |                                 |  |  |
| BCEN2424_RS03605 | LysR family transcriptional regulator                    |                                     |  |  |                              |  |  |                                 |  |  |
| BCEN2424_RS12245 | Putative threonine-phosphate decarboxylase               |                                     |  |  |                              |  |  |                                 |  |  |
| BCEN2424_RS08600 | RND family efflux transporter MFP subunit                |                                     |  |  |                              |  |  |                                 |  |  |
| BCEN2424_RS33835 | Short-chain dehydrogenase/reductase SDR                  |                                     |  |  |                              |  |  |                                 |  |  |
| BCEN2424_RS08080 | Taurine catabolism dioxygenase <i>tauD</i> / <i>ltdA</i> |                                     |  |  |                              |  |  |                                 |  |  |
| BCEN2424_RS06740 | TonB-dependent siderophore receptor                      |                                     |  |  |                              |  |  |                                 |  |  |

402

403 **Table 1:** Genes in which mutations were observed in two or more populations. Each column  
 404 represents one replicate population. Note that constant planktonic populations evolved for only  
 405 11 days and were sampled only at the final time point. A complete list of mutations that evolved  
 406 in each population is given in Table S1.

407

408

409 **Figures:**

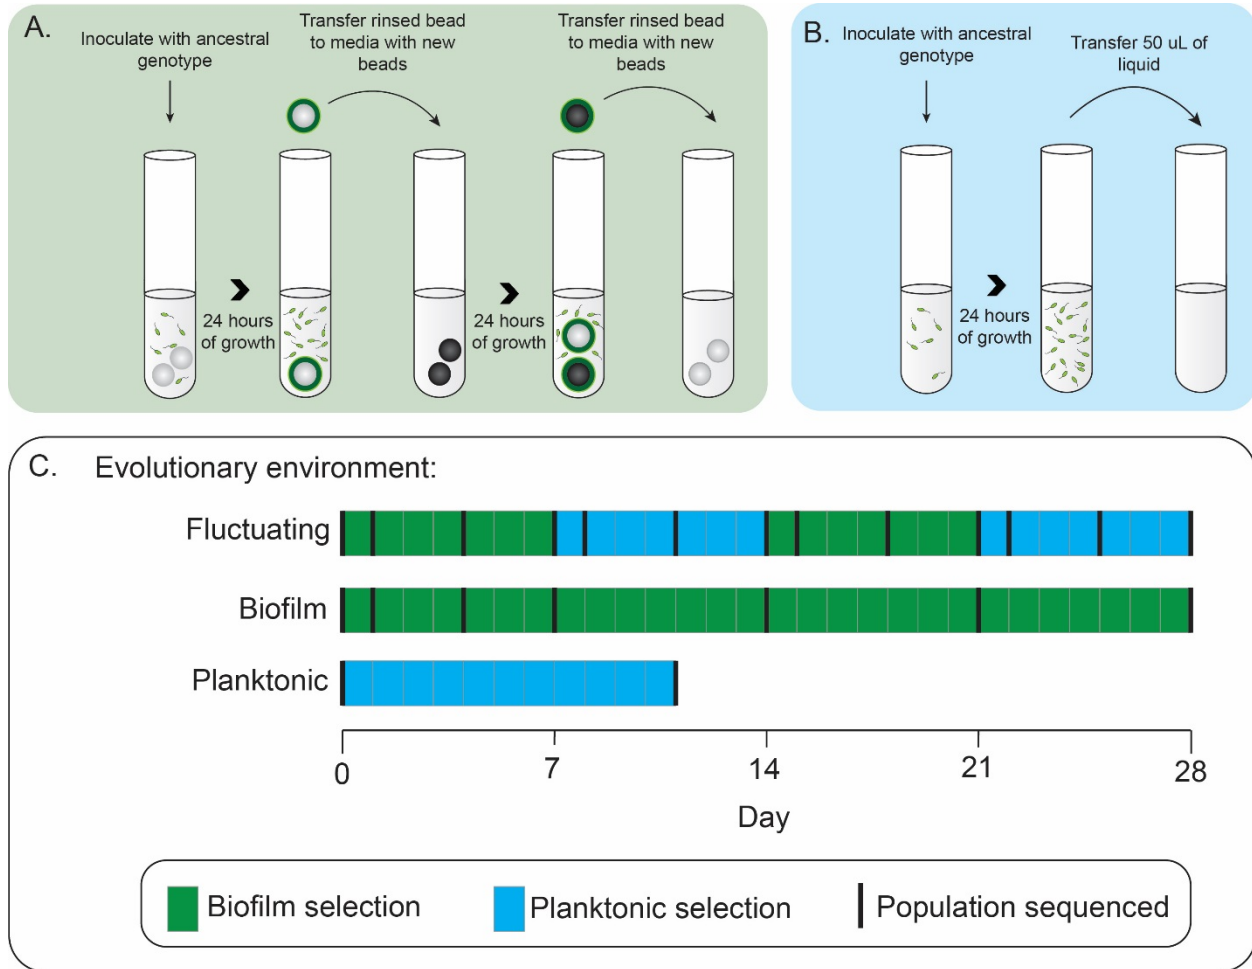

410

411 **Figure 1:** Design of evolution experiments. **A.** Under biofilm selection, a colonized bead was  
412 transferred every 24 hours (diagram modified from Turner et al. 2018). **B.** Under planktonic  
413 selection 50  $\mu$ L of liquid culture was transferred every 24 hours. **C.** Populations were propagated  
414 in fluctuating biofilm and planktonic, constant biofilm, or constant planktonic environments and  
415 sequenced at indicated time points.

416

417

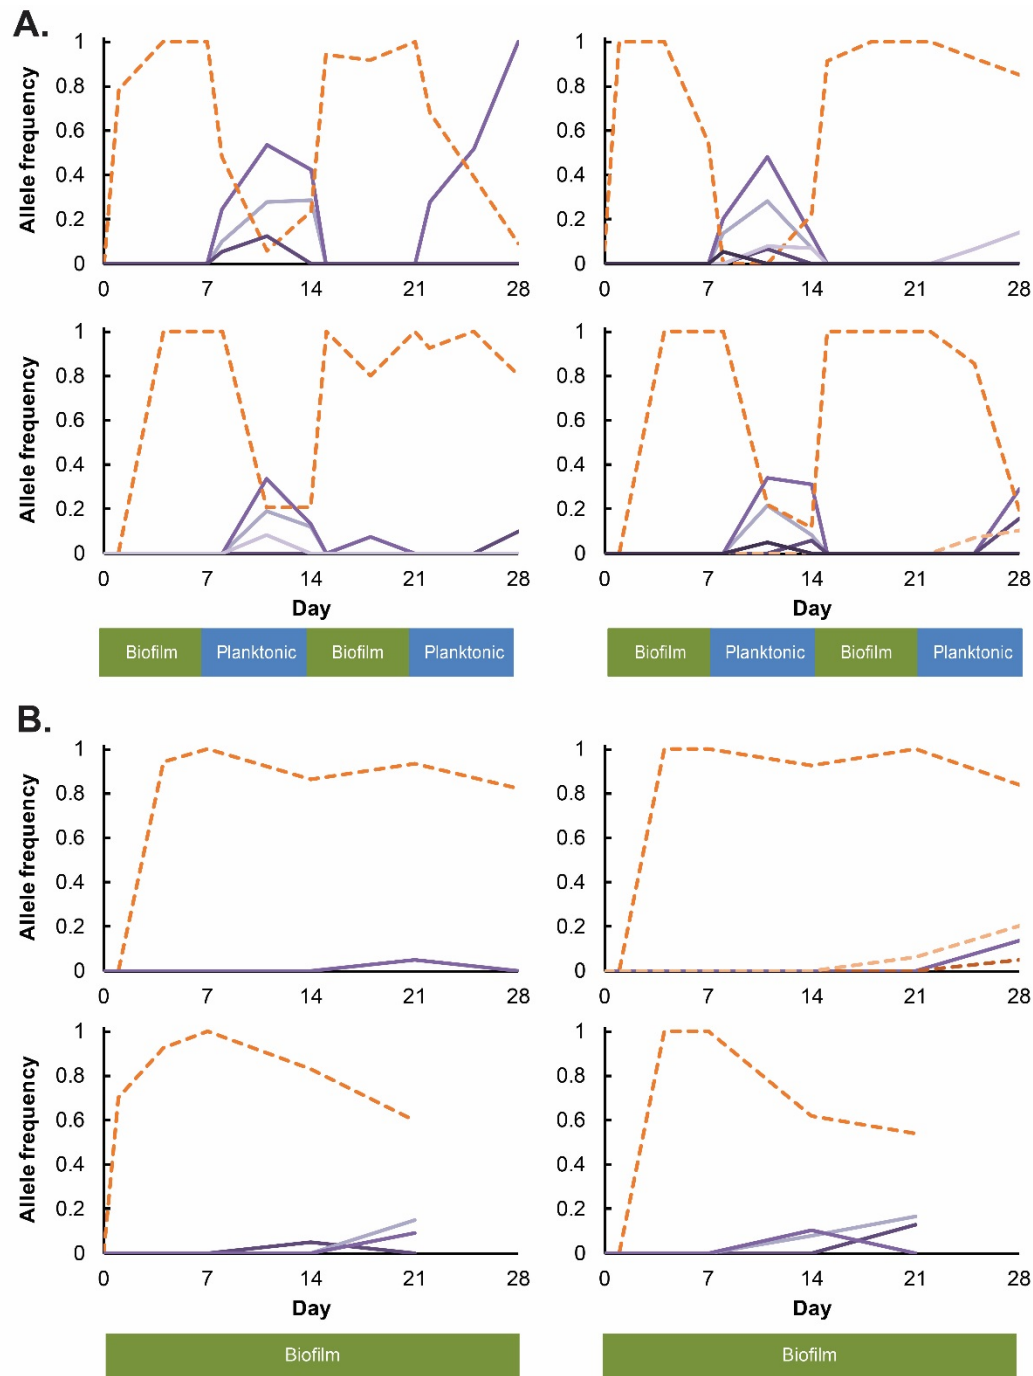

418

419 **Figure 2:** Evolutionary dynamics reveal the co-existence of *wspA* (dashed orange lines) and *rpfR*  
420 (solid purple lines) mutant genotypes in **A.** fluctuating and **B.** constant biofilm environments.  
421 Within each panel, different shades of orange and purple indicate different mutant alleles within  
422 the *wspA* and *rpfR* genes.

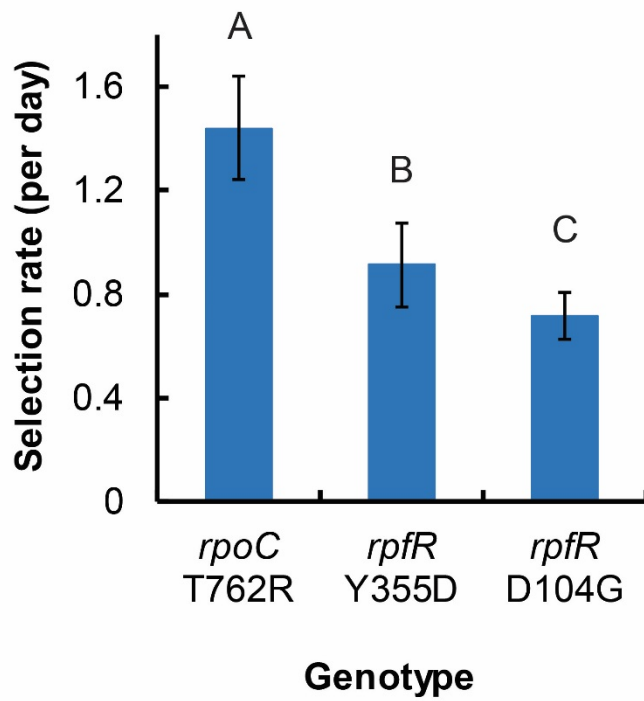

423

424 **Figure 3:** The planktonic fitness advantage of the *rpfR* mutants is less than that of the *rpoC*  
425 T762R mutant isolated from a constant planktonic population (mean  $\pm$  95% confidence interval,  
426 ANOVA with Tukey's post-hoc test  $F=47.8$ ,  $p < 10^{-5}$ , bars with different letters are significantly  
427 different from each other).

428

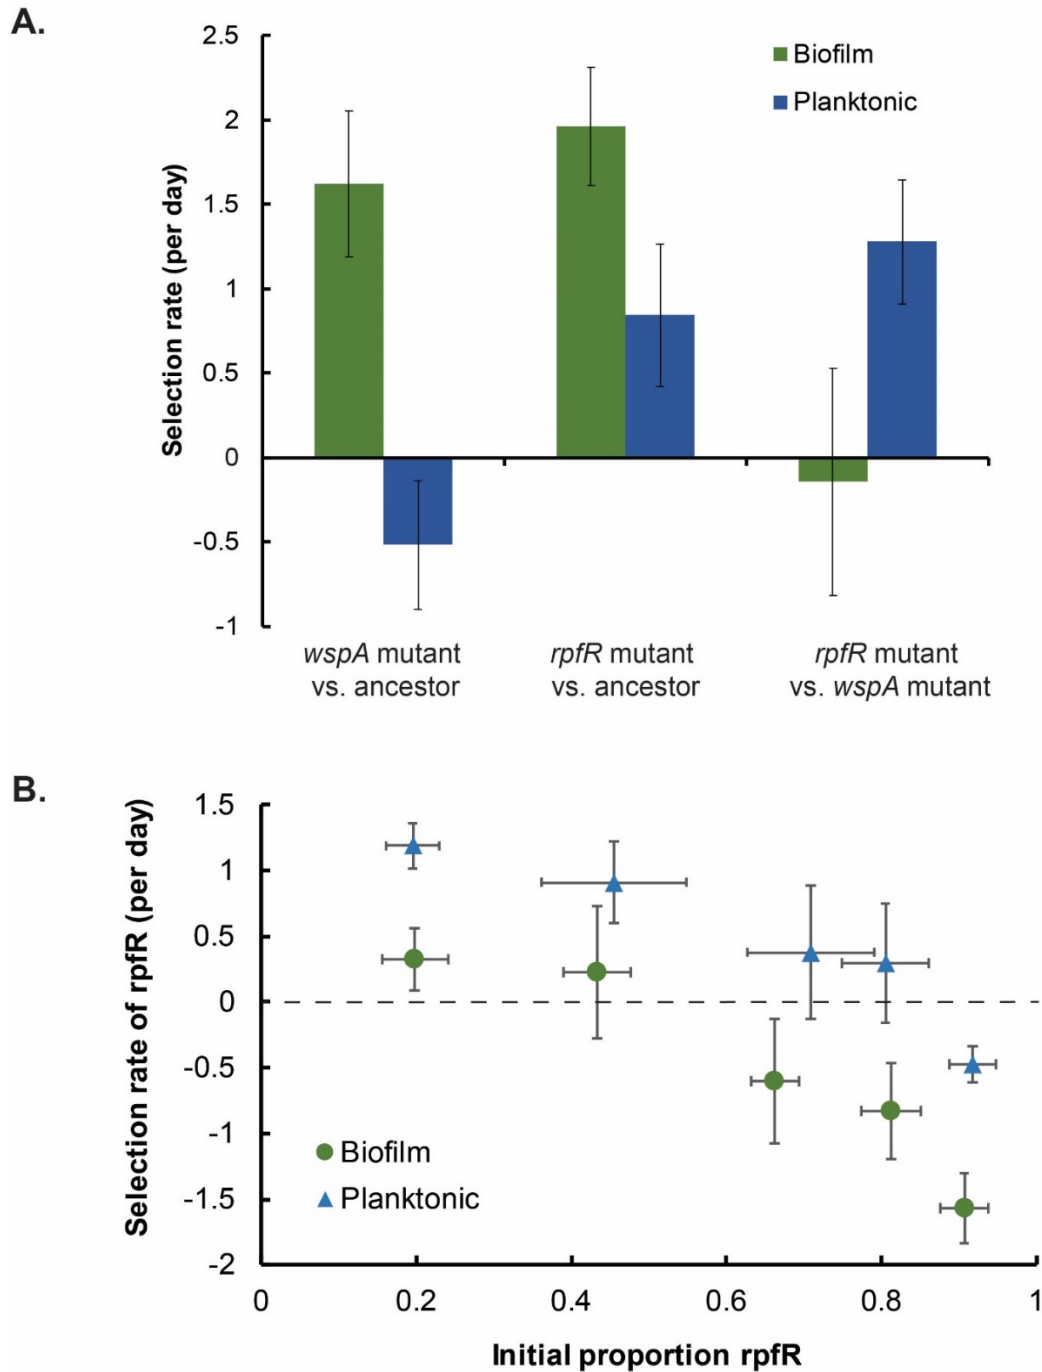

429

430 **Figure 4:** The *rpfR* (D104G) and *wspA* (F463L) mutants exhibit negative frequency-dependence  
431 under both biofilm (green) and planktonic (blue) conditions. **A.** Fitness (mean  $\pm$  95% confidence  
432 interval) of *wspA* F463L and *rpfR* D104G genotypes in pairwise competitions with equal starting  
433 ratios. **B.** Fitness at a range of starting ratios.

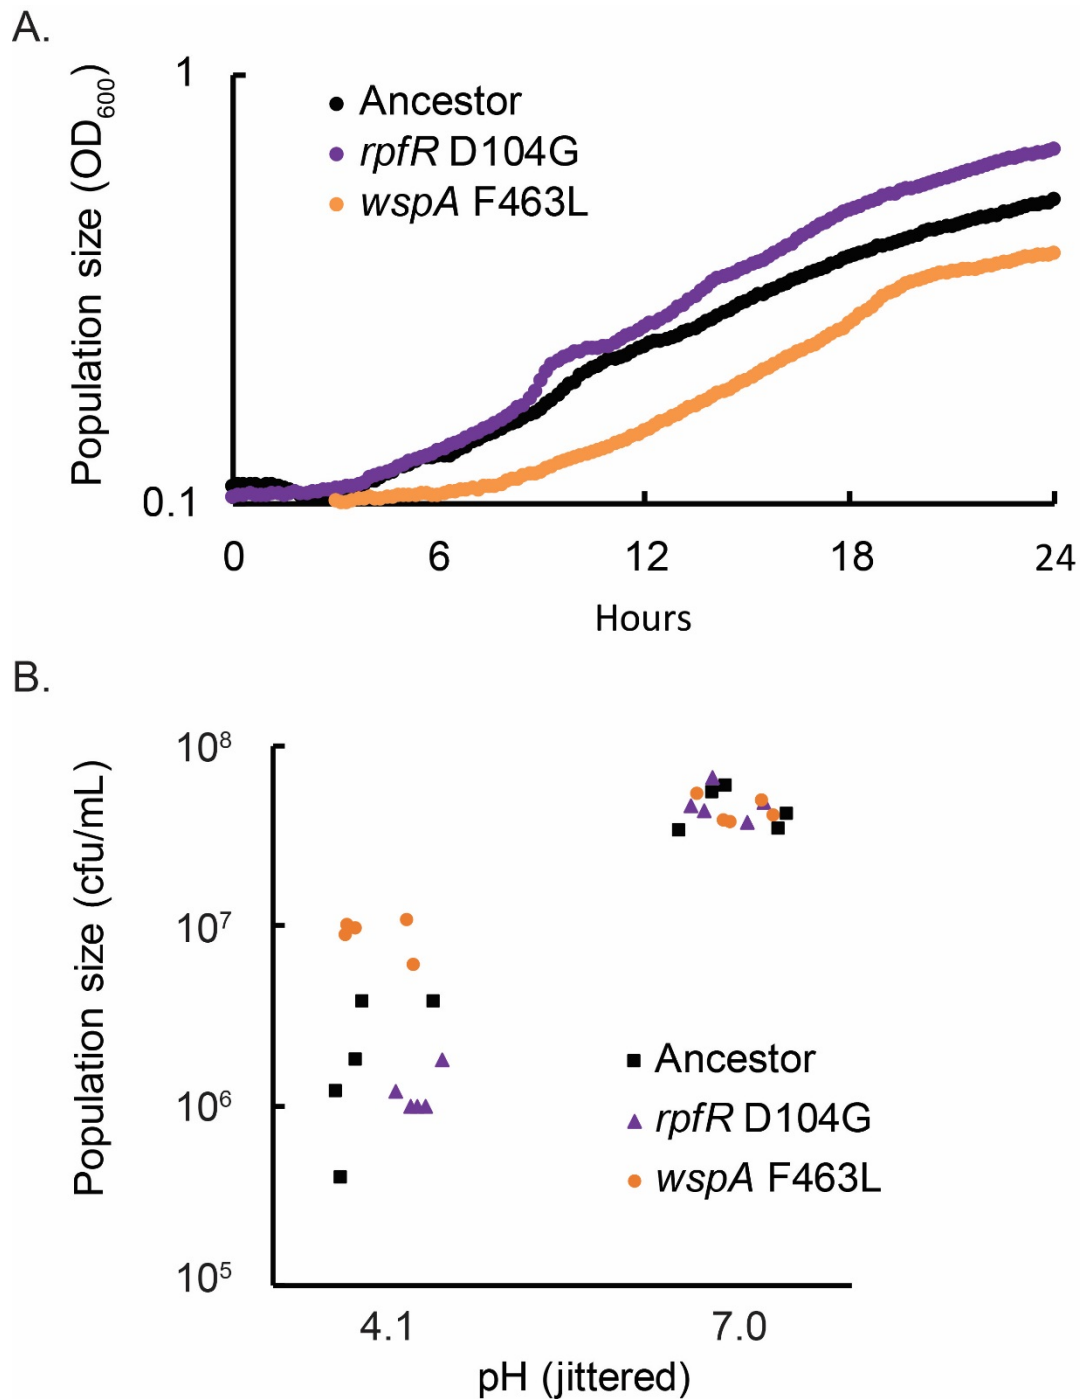

434

435 **Figure S1:** Growth and survival differences between *rpfR* and *wspA* mutants. **A.** The *rpfR*  
436 D104G mutant grew more quickly than the *wspA* F463L mutant in evolution media. **B.** The *wspA*  
437 F463L mutant had higher survival in pH 4.1 PBS for 24 hours than the *rpfR* D104G mutant  
438 (ANOVA with Tukey's post-hoc test  $F=46.2$ ,  $p < 10^{-5}$ ), while there were no differences between  
439 genotypes in survival at pH 7 (ANOVA  $F=0.3$ ,  $p = 0.77$ ).

## 440 **References cited**

- 441 Barrick, J. E., M. R. Kauth, C. C. Strelhoff, and R. E. Lenski. 2010. *Escherichia coli rpoB* mutants have  
442 increased evolvability in proportion to their fitness defects. *Molecular Biology and evolution*  
443 27:1338-1347.
- 444 Beaumont, H. J., J. Gallie, C. Kost, G. C. Ferguson, and P. B. Rainey. 2009. Experimental evolution of bet  
445 hedging. *Nature* 462:90.
- 446 Becks, L., S. P. Ellner, L. E. Jones, and N. G. Hairston Jr. 2010. Reduction of adaptive genetic diversity  
447 radically alters eco-evolutionary community dynamics. *Ecol. Lett.* 13:989-997.
- 448 Bohannan, B. J. M., B. Kerr, C. M. Jessup, J. B. Hughes, and G. Sandvik. 2002. Trade-offs and  
449 coexistence in microbial microcosms. *Antonie Van Leeuwenhoek* 81:107-115.
- 450 Bolger, A. M., M. Lohse, and B. Usadel. 2014. Trimmomatic: a flexible trimmer for Illumina sequence  
451 data. *Bioinformatics* 30:2114-2120.
- 452 Botero, C. A., F. J. Weissing, J. Wright, and D. R. Rubenstein. 2015. Evolutionary tipping points in the  
453 capacity to adapt to environmental change. *Proc. Natl. Acad. Sci. USA* 112:184-189.
- 454 Brzezinski, M. A. and D. M. Nelson. 1988. Interactions between pulsed nutrient supplies and a photcycle  
455 affect phytoplankton competition for limiting nutrients in long-term culture. *J. Phycol.* 24:346-  
456 356.
- 457 Burke, M. K., J. P. Dunham, P. Shahrestani, K. R. Thornton, M. R. Rose, and A. D. Long. 2010. Genome-  
458 wide analysis of a long-term evolution experiment with *Drosophila*. *Nature* 467:587.
- 459 Conrad, T. M., M. Frazier, A. R. Joyce, B.-K. Cho, E. M. Knight, N. E. Lewis, R. Landick, and B. Ø.  
460 Palsson. 2010. RNA polymerase mutants found through adaptive evolution reprogram  
461 *Escherichia coli* for optimal growth in minimal media. *Proc. Natl. Acad. Sci. USA* 107:20500-  
462 20505.
- 463 Corander, J., C. Fraser, M. U. Gutmann, B. Arnold, W. P. Hanage, S. D. Bentley, M. Lipsitch, and N. J.  
464 Croucher. 2017. Frequency-dependent selection in vaccine-associated pneumococcal population  
465 dynamics. *Nature Ecol. Evol.* 1:1950.
- 466 Deatherage, D. E. and J. E. Barrick. 2014. Identification of mutations in laboratory-evolved microbes from  
467 next-generation sequencing data using breseq. Pp. 165-188 in L. Sun, and W. Shou, eds.  
468 Engineering and analyzing multicellular systems: methods and protocols. Humana Press, New  
469 York, NY.
- 470 Drevinek, P. and E. Mahenthiralingam. 2010. Burkholderia cenocepacia in cystic fibrosis: epidemiology  
471 and molecular mechanisms of virulence. *Clin. Microbiol. Infect.* 16:821-830.
- 472 Edwards, K. F., C. T. Kremer, E. T. Miller, M. M. Osmond, E. Litchman, and C. A. Klausmeier. 2018.  
473 Evolutionarily stable communities: a framework for understanding the role of trait evolution in the  
474 maintenance of diversity. *Ecol. Lett.* 21:1853-1868.
- 475 Ellis, C. N., C. C. Traverse, L. Mayo-Smith, S. W. Buskirk, and V. S. Cooper. 2015. Character  
476 displacement and the evolution of niche complementarity in a model biofilm community.  
477 *Evolution* 69:283-293.
- 478 Flemming, H.-C. and S. Wuertz. 2019. Bacteria and archaea on Earth and their abundance in biofilms.  
479 *Nature Reviews Microbiology*:1.
- 480 Gloss, A. D., S. C. Groen, and N. K. Whiteman. 2016. A genomic perspective on the generation and  
481 maintenance of genetic diversity in herbivorous insects. *Annual Review of Ecology, Evolution,*  
482 *and Eystematics* 47:165-187.
- 483 Good, B. H., M. J. McDonald, J. E. Barrick, R. E. Lenski, and M. M. Desai. 2017. The dynamics of  
484 molecular evolution over 60,000 generations. *Nature* 551:45.
- 485 Hall-Stoodley, L. and P. Stoodley. 2005. Biofilm formation and dispersal and the transmission of human  
486 pathogens. *Trends Microbiol.* 13:7-10.



- 487 Huang, W., R. F. Lyman, R. A. Lyman, M. A. Carbone, S. T. Harbison, M. M. Magwire, and T. F.  
488 Mackay. 2016. Spontaneous mutations and the origin and maintenance of quantitative genetic  
489 variation. *eLife* 5:e14625.
- 490 Karve, S. M., D. Bhawe, D. Nevgi, and S. Dey. 2016. *Escherichia coli* populations adapt to complex,  
491 unpredictable fluctuations by minimizing trade-offs across environments. *J. Evol. Biol.* 29:2545-  
492 2555.
- 493 Kassen, R. 2002. The experimental evolution of specialists, generalists, and the maintenance of diversity.  
494 *J. Evol. Biol.* 15:173-190.
- 495 Kassen, R. 2014. *Experimental evolution and the nature of biodiversity*. Roberts & Company. Greenwood  
496 Village, CO.
- 497 Kinnersley, M., J. Wenger, E. Kroll, J. Adams, G. Sherlock, and F. Rosenzweig. 2014. Ex uno plures:  
498 clonal reinforcement drives evolution of a simple microbial community. *PLoS genetics*  
499 10:e1004430.
- 500 Lang, G. I., D. P. Rice, M. J. Hickman, E. Sodergren, G. M. Weinstock, D. Botstein, and M. M. Desai.  
501 2013. Pervasive genetic hitchhiking and clonal interference in forty evolving yeast populations.  
502 *Nature* 500:571-574.
- 503 Legan, J., J. Owens, and G. Chilvers. 1987. Competition between specialist and generalist methylotrophic  
504 bacteria for an intermittent supply of methylamine. *Microbiology* 133:1061-1073.
- 505 Lenski, R. E., M. R. Rose, S. C. Simpson, and S. C. Tadler. 1991. Long-term experimental evolution in  
506 *Escherichia coli*. I. Adaptation and divergence during 2,000 generations. *The American Naturalist*  
507 138:1315-1341.
- 508 LiPuma, J. J., T. Spilker, T. Coenye, and C. F. Gonzalez. 2002. An epidemic *Burkholderia cepacia*  
509 complex strain identified in soil. *The Lancet* 359.
- 510 Mann, E. E. and D. J. Wozniak. 2012. *Pseudomonas* biofilm matrix composition and niche biology.  
511 *FEMS Microbiol. Rev.* 36:893-916.
- 512 Maynard Smith, J. and R. Hoekstra. 1980. Polymorphism in a varied environment: how robust are the  
513 models? *Genetics Research* 35:45-57.
- 514 O'Rourke, D., C. E. FitzGerald, C. C. Traverse, and V. S. Cooper. 2015. There and back again:  
515 consequences of biofilm specialization under selection for dispersal. *Front. Genet.* 6.
- 516 Poltak, S. R. and V. S. Cooper. 2011. Ecological succession in long-term experimentally evolved biofilms  
517 produces synergistic communities. *ISME J.* 5:369-378.
- 518 Reboud, X. and G. Bell. 1997. Experimental evolution in *Chlamydomonas*. III. Evolution of specialist and  
519 generalist types in environments that vary in space and time. *Heredity* 78:507.
- 520 Remold, S. K., A. Rambaut, and P. E. Turner. 2008. Evolutionary genomics of host adaptation in vesicular  
521 stomatitis virus. *Mol. Biol. Evol.* 25:1138-1147.
- 522 Rodríguez-Verdugo, A., D. Carrillo-Cisneros, A. González-González, B. S. Gaut, and A. F. Bennett. 2014.  
523 Different tradeoffs result from alternate genetic adaptations to a common environment. *Proc. Natl.*  
524 *Acad. Sci. USA* 111:12121-12126.
- 525 Rodríguez-Verdugo, A., C. Vulin, and M. Ackermann. 2019. The rate of environmental fluctuations  
526 shapes ecological dynamics in a two-species microbial system. *Ecol. Lett.*
- 527 Rozen, D. E. and R. E. Lenski. 2000. Long-term experimental evolution in *Escherichia coli*. VIII.  
528 Dynamics of a balanced polymorphism. *The American Naturalist* 155:24-35.
- 529 Silva, I. N., P. M. Santos, M. R. Santos, J. E. Zlosnik, D. P. Speert, S. W. Buskirk, E. L. Bruger, C. M.  
530 Waters, V. S. Cooper, and L. M. Moreira. 2016. Long-term evolution of *Burkholderia multivorans*  
531 during a chronic cystic fibrosis infection reveals shifting forces of selection. *mSystems* 1:e00029-  
532 00016.
- 533 Traverse, C. C., L. M. Mayo-Smith, S. R. Poltak, and V. S. Cooper. 2013. Tangled bank of experimentally  
534 evolved *Burkholderia* biofilms reflects selection during chronic infections. *Proc. Natl. Acad. Sci.*  
535 *USA* 110:E250-E259.

- 536 Turner, C. B., Z. D. Blount, D. H. Mitchell, and R. E. Lenski. 2015. Evolution and coexistence in response  
537 to a key innovation in a long-term evolution experiment with *Escherichia coli*. bioRxiv:020958.  
538 Turner, C. B., C. W. Marshall, and V. S. Cooper. 2018. Parallel genetic adaptation across environments  
539 differing in mode of growth or resource availability. *Evolution letters* 2:355-367.  
540 Van Tienderen, P. H. 1997. Generalists, specialists, and the evolution of phenotypic plasticity in sympatric  
541 populations of distinct species. *Evolution* 51:1372-1380.  
542 Vasilakis, N., E. R. Deardorff, J. L. Kenney, S. L. Rossi, K. A. Hanley, and S. C. Weaver. 2009.  
543 Mosquitoes put the brake on arbovirus evolution: experimental evolution reveals slower mutation  
544 accumulation in mosquito than vertebrate cells. *PLoS Path.* 5:e1000467.  
545 Weaver, S. C., A. C. Brault, W. Kang, and J. J. Holland. 1999. Genetic and fitness changes accompanying  
546 adaptation of an arbovirus to vertebrate and invertebrate cells. *J. Virol.* 73:4316-4326.  
547 Zhao, S., T. D. Lieberman, M. Poyet, K. M. Kauffman, S. M. Gibbons, M. Groussin, R. J. Xavier, and E.  
548 J. Alm. 2019. Adaptive Evolution within Gut Microbiomes of Healthy People. *Cell Host &*  
549 *Microbe* 25:656–667.

550
